# Supplementary material
Source: publisher figshare collection journal article supplement (https://tandf.figshare.com/ndownloader/files/12265514)
Supplement: Supplementary file 1 [file 12265514]

Supplementary table 1: Literature search in Pubmed (A) and Web of Science (B)

| *A: Literature search Pubmed* | | | |
| --- | --- | --- | --- |
|  | **MeSH terms and key words in PubMed** | **Hits – December 2016** | **Hits – August 2017** |
| #1 | Parkinson[Title/Abstract] OR Parkinson disease[MeSH] | 62882 | 65259 |
| #2 | Turning[Title/Abstract] OR pivot[Title/Abstract] OR circumduct[Title/Abstract] | 19320 | 20148 |
| #3 | Freezing[Title/Abstract] OR freezing of gait[Title/Abstract] | 29482 | 30512 |
| #4 | #1 AND #2 | 284 | 298 |
| #5 | #1 AND #3 | 756 | 802 |
| #6 | #1 AND #2 AND #3 | 47 | 52 |

| *B: Literature search Web of Science* | | | |
| --- | --- | --- | --- |
|  | **Key words in Web of Science** | **Hits – December 2016** | **Hits – March 2017** |
| #1 | Parkinson[Topic] OR Parkinson disease[Topic] | 93955 | 100159 |
| #2 | Turning[Topic] OR pivot[Topic] OR circumduct[Topic] | 465591 | 488955 |
| #3 | Freezing[Topic] OR freezing of gait[Topic] | 187961 | 196057 |
| #4 | #1 AND #2 | 1376 | 1467 |
| #5 | #1 AND #3 | 1237 | 1360 |
| #6 | #1 AND #2 AND #3 | 93 | 102 |

Supplementary table 2: Data extraction of the included articles. A significant difference between subject characteristics is indicated with *.

| Article | Participants | Protocol | Outcome and results |
| --- | --- | --- | --- |
| Arias P, et al., 2010 [38] | - 19 PD patients - FRs n=9 - NFRs: n=10 - Mean values: FRs vs NFRs - Age: 68.2-64.4 years - FOG-Q: 16.7-0* - UPDRS III: ns | - Tests: in OFF-state of medication - Protocol: Walk down a corridor with a door in the middle 🡪 touch a button on the wall at the end 🡪 turn around 🡪 come back and touch the button on the other wall. - Equipment: footswitches | - *Turn time*: FRs > NFRs |
| Bengevoord A., et al., 2016 [31] | - 30 PD patients - FRs: n=16 - NFRs: n=14 - Mean values: FRs vs NFRs - Age: 68,8-65,3years - Gender(%male): 85,7-71,4% - DD: 9,6-7,8years - H&Y: 2,5-2,3 - MDS-UPDRS III: 37,9-34,5 - MMSE: 29,1-27,7 - NFOG-Q: 13,5-0* - LED (mg/day): 567-472 | - Tests: in OFF-state of medication - Protocol: walk 5m and turn 180° 🡪 3 times to the left and 3 times to the right - The turn was divided in 4 quadrants (between 10°-170°) - Equipment: “Vicon Motion System with retroreflective markers | - *COM behaviour during turning quadrants:* - *Turn time*: FRs > NFRs - *COM distance:* no differences between groups - *COM velocity:* no differences between groups - *Step width:* FRs < NFRs - *Medial COM position*: no differences between groups - *Anterior COM position*: no differences between groups - *COM behaviour pre-FOG* - *Turn time*: increased - *COM distance*: no differences - *COM velocity*: no differences - *Step width*: decreased - *COM position*: more anteriorly, less medially - *FOG frequency*: 6 FRs had a total of 21 FOG episodes during turning |
| Bhatt H, et al., 2013 [35] | - 20 PD patients - FRs: n=10 - NFRs: n=10 - Mean values: FRs vs NFRs - Age: 74,4-72,3 years - UPDRS III: 33,8-33,4 | - Tests: in ON-state of medication - Protocol: walk 6m and turn randomly 90°, 120° and 180° to the right. Each 3 trials. - Equipment: 6 Optotrak Certus Motion Capture cameras; 9 IREDs (foot markers and pelvis markers); Video cameras to identify turn types and FOG episodes | - *Step length*: decreased while turning angle increased in both goups - *Step width*: - NFRs: increased step width during 180° turns - FRs: no change at all turning angles - *Step time variability*: increased while turning angle increased in FRs - *Turn types*: - During 90° turn: NFRs showed more crossover turns than FRs - During 120° turn: FRs and NFRs showed step out strategy - During 180° turn: FRs used the step out strategy or the mixed strategy (without preference) - *FOG episode*: 18 episodes in 4FRs 🡪 mainly at 120° and 180° |
| De Souza Fortaleza AC, et al. 2017 [41] | - 54 PD patients - FRs: n=26 - NFRs: n=30 - Mean values: FRs vs NFRs - Age: 69.2-68.6 years - Gender(%male): 56.5-70% - NFOG-Q: 14.3-0* - DD: 8.3-6.3 years - MDS-UPDRS III: 43.1-38.7 - PIGD:6.8-4.5* - MoCA: 24.9-25 - Mini-Best: 15.8-19.6* - LED (mg/day): 875.5-711.1 | - Tests: in OFF-state of medication - Protocol: Walk 7m, turn 180° and walk back with and without a cognitive dual task - Equipment: 8 Opal inertial sensors (APDM, Inc) on the feet, shanks, wrists, chest and trunk | - No Group differences for *dual task costs* during turning - *Turn peak velocity*: FRs < nFRs |
| Fietzek UM, et al., 2017 [37] | - 40 PD patients - FRs: n=21 - NFRs: n=19 - Mean values: FRs vs NFRs - Age: 67.0-67.0 years - DD: 9.1-6.1 years* - FOGQ: 13.1-4.0* - MDS-UPDRS III: 34.4-25.7* - H&Y:2.5-2.0 - LED (mg/day): 1037.5-616.5 - MoCA: 25.5-26.5 | - Tests: in ON-state of medication - Protocol: 360° turns in both directions on floor squares of 30x30cm, 40x40cm and 50x50cm. total of 6 trials - Equipment: two lightweight gyroscopes at the shanks and a 3D-magnetometer on the back | - *#steps*: FRs > nFRs in all conditions, differences increases with smaller floor squares - *Turn duration*: FRs > nFRs in all conditions, differences increases with smaller floor squares |
| Lohnes CA, et al., 2011 [40] | - 23 PD patients - FRs: n=8 - NFRs: n=14 - Mean values: FRs vs NFRs - DD: 8,6-6,7 years - MDS-UPDRS III: 40,1-40,1 | - Tests: in OFF-state of medication - Protocol: completion of in-place turns (90° and 180°) to the left and to the right (randomly ordered). At least 5 trials to each direction. - Equipment: Eight camera high-resolution motion capture system and retro-reflective markers. For oculomotor data: Head-mounted infrared binocular eye tracking system and EOG | - *Turn duration:* FRs > nFRs - *# steps:* FRs > nFRs - *# saccades and amplitude of initial saccade:* no group differences |
| Mancini M, et al., 2017 [39] | - 28 PD patients - FRs: n=16 - NFRs: n=12 - Mean values: FRs vs NFRs - Age: 67- 65 - UPDRS III: 36,9- 29,2* - PIGD: 3,5- 1,8* | - Tests: in OFF-state of medication - Protocol: 7m iTUG and 360° turn-in-place to the right and left side during for 2 min. - Equipment: 3 Opal inertial sensors (APDM, Inc) on shanks and trunk | - *#turns within 2 min:*   No group differences when corrected for disease severity (ANCOVA)   - *Average peak velocity:* - *Average jerkiness:* - *FOG-episode:* - 13 FRs experienced a FOG episode during 2min-turning - 2 FRs experienced a FOG episode during the iTUG |
| McNeely ME, et al., 2011 [43] | - 20 PD patients - FRs: n=10 - NFRs: n=10 - Mean values: FRs vs NFRs - Age: 75,3- 74 - DD: 11,5-9,1 - LED (mg/day): 1490,7-728,9* - FOG-Q: 12,6- 4,8* - UPDRS III: 28,4-45,0 | - Tests: in OFF and ON-state of medication - Protocol: in-place 180° turns, to the left and to the right. 10 times to each direction. - Equipment: An eight camera 3D motion capturing system | - *Turn duration:* FRs > nFRs (larger medication effect in FRs) - *# steps:* FRs > nFRs (Larger medication effect in FRs) |
| Nieuwboer A, et al., 2009 [27] | - 133 PD patients - 68 FRs - 65 NFRs - Mean values: FRs vs NFRs - Age: 67,3-66 - DD: 8,7-7,8 - FOGQ: 12,5-4,4* - UPDRS-III: 35,2-32 - MMSE: 27,9-28,3 - LED: 526,2-405,2 | - Tests: in ON state of medication - Protocol: walk to a chair placed 6 m away 🡪 pick up a tray with 2 cups 🡪 turn around 180° 🡪carry the tray back to the start position - Equipment: The vitaport activity monitor and 5 accelerometers placed on the body. | - *FOG episode:* 31 episodes in 8 FRs - *Turn duration:* FRs > nFRs |
| Peterson DS, et al., 2012 [42] | - 31 PD patients   - FRs: n=12   - NFRs: n=19 - Mean values: FRs vs NFRs - Age: 72-69 years - DD: 8,0-6,6 years - MDS-UPDRS III: 45,5-41,6 - H&Y: 2,63-2,37 - FOG-Q: 12,6-4,2* | - Tests: in OFF state of medication - Protocol: - Turning to the left and right in a small radius circle (0,6m) - Turning to the left and right in a large radius circle (3m) - Equipment: 6 footswitches on the sole of each shoe (3 near the toes, 3 near the heel) and digital video. | - FOG-episodes in 7 FRs: most frequently during small radius circles - PCI: FRs > nFRs and large radius turn< small radius turn |
| Sijobert B, et al., 2016 [36] | - 13 PD patients - FRs n=9 - NFRs: n=4 - Mean values: FRs vs NFRs - No information | - Medication: No information - Protocol: Started from standing in the middle of a gait carpet 🡪 walk towards a line 🡪 make U-turn 🡪 walk 5 meters 🡪 walk around a cone and keep walking to the start line - Equipment: - An electrical stimulator and a foot mounted inertial measurement unit (as a cueing method) | - No statistical comparisons between FR and nFR |
| Spildooren J, et al., 2010 [28] | - 28 PD patients - FRs n=14 - nFRs n=14 - Mean values: FRs vs NFRs - Age: 68.6-66.7 years - DD: 9.0-7.8 years - UPDRS-III: 37.9-34.4 - H&Y: 2.5-2.4 - MMSE: 27.7-28.7* | - Tests: in OFF state of medication - Protocol: Walk along a walkway of 5m between two retroreflective markers placed 0,5m away from each other 🡪 make a left or right turn of varying angles (180° or 360°) around the marker before walking further - with and without a verbal cognitive DT - Equipment: An eight camera VICON data capturing system with retroreflective markers placed on the body | - *Turn duration:* FRs > nFRs while turning 360° - *#steps:* FRs > nFRs while turning 360° - *Cadence:* increases for FRs during turning (180° and 360°) but decreases in non-freezers during turning - *Freezing episodes:* in 10 FRs - During DT: 360° turn> 180° turn - *Secondary task performance*: decreases in FRs when increasing the turning angle - Errors on DT: FRs > NFRs |
| Spildooren J, et al., 2012 [32] | - 30 PD patients - FRs: n=16 - NFRs: n=14 - Mean values: FRs vs NFRs - Age: 67,9- 68,3 years - DD: 9,3- 8 years - H&Y: 2- 2,3 - UPDRS-III: 42,4- 37,4 - MMSE: 28 vs 29 | - Tests: in OFF state of medication - Protocol: walk 5m 🡪 turn 180° 🡪 walk back to start position   Turning: towards disease dominant and non-dominant side, each condition was executed 3 times.   - Equipment: Eight camera VICON data capturing system | - *Cadence:* FRs > nFRs, - Higher when turning toward disease-dominant side in FRs and NFRs - *#steps:* FRs > nFRs - more steps needed while turning to disease dominant side - *Turn duration:* - Increased when turning towards the disease dominant side - *#FOG episodes:* 94 were detected in 7 FRs - No influence of turn direction - more FOG at the inner side of the turning cycle - *Effect of cueing the disease dominant or non-dominant side:* - No interaction effect or main effect |
| Spildooren J, et al., 2013 [33] | - 27 PD patients - FRs: n=13 - NFRs: n=14 - Means FRs vs NFRs: - Age: 68,1-65,2 years - DD: 9-7,8 years - H&Y: 2,5-2,4 - UPDRS-III: 38,7-34,4 - NFOG-Q: 14-0* | - Tests: in OFF-state of medication - Protocol: 5m walk towards retroreflective makers 🡪 turn 180° around the turning markers (to the left and tot the right). Each condition was executed 3 times - Equipment: A Vicon data-capturing system and retroreflective markers applied to the body | - *Turn depth:* no differences 🡪 good standardization - No *interaction effect of group-DT* for head, trunk, and pelvis kinematic data 🡪 data pooled - *FOG episodes:* 29 episodes in 5 FRs 🡪 mainly at the end of a turn - *Turn preparation:* - NFRs earlier head rotation compared to FRs - In FOG-trials: head rotation did not precede thorax and pelvic rotation (lack of axial preparation) - *Supplementary analysis of footstep pattern pre-FOG*: no differences in cadence, step length, step time, step width between trials with and without FOG - *Max head*-pelvis separation: No group differences or differences between trials with and without FOG - *Timing max head-pelvis separation*: nFRs < FRs - *Neck rigidity*: FRs > nFRS |
| Vervoort G, et al., 2016 [34] | - 73 PD patients - FRs: n=13 - NFRs: n=60 - Means FRs vs NFRs: - Age: 65,8 -57,7years* - DD: 7,9-5,8 years - H&Y: 2,2-2 - MDS-UPDRS-III: 38.3-25,9* - MMSE: 28,5-28 - NFOG-Q: 15,8-0* - LED (mg/day): 604,8-409,7 | - Tests: in OFF state of medication - Protocol: Turn (360° to the left and to the right) 6 times - Random application of single task and dual task conditions (auditory Stroop task as dual task) - Equipment: VICON 3D motion analysis system | - *Turn duration:* FRs > nFRs with and without DT - *#steps:* FRs > nFRs while DT |
| Willems AM, et al., 2007 [22] | - 19 PD patients - 9 freezers - 10 non-freezers - Means FRs vs NFRs: - Age: 68,1-60,6 years* - DD: 11,5-6,2 years* - UPDRS-III: 27,9-24,7 - H&Y: 2,8-2,6 - FOGQ: 15,6-5,5* - MMSE: 26,9-28,5 | - Tests: in ON state of medication - Protocol: Walk along a walkway (with obstacle at standard distance of 5m)🡪 make a left turn (180°) around it 🡪 return to starting position - The condition was repeated 3 times - Equipment: An eight camera VICON data capturing system | - *FOG episodes:* 1 trial in 1 FR - *#steps and turn duration:* ns - *Turn height and length:* FRs > nFRS - *Turn width:* ns |

PD, Parkinson’s Disease; FRs, Freezers; nFRS, non-freezers; FOG, freezing of gait; FOG-Q, Freezing of Gait Questionnaire; NFOG-Q, New Freezing of Gait Questionnaire; UPDRS-III, Unified Parkinson’s Disease Rating Scale part III (motor examination); MDS-UPDRS-III, new modified version of UPDRS; DD, disease duration; H&Y, Hoehn and Yahr stage; LED, levodopa equivalent dose; MMSE, Mini-mental state examination; MoCA, Montreal Cognitive Assessment; PIGD, Postural instability and gait disorders; COM, Center of mass; mini-Best, Mini Balance Evaluation Systems Test; iTUG, instrumented Timed up and go; PCI, Phase coordination index; EOG, electrooculography.

* p<0.05

| Supplementary table 3: Strengths and limitation of the included articles | | |
| --- | --- | --- |
| Article | **Strengths** | **Limitations** |
| Arias P, et al., 2010 [38] | - No differences in demographics and disease development between groups - Trials were performed at a certain sequence to avoid carryover effect - Sensitivity analysis - Mentioning of sources of bias - Statistical methods were well described | - No explanation on how missing data were addressed - No reporting of numbers of individuals at each stage of the study - The effect of stimulation was assessed for a limited period of time 🡪 no research of long term effects - FOG-episodes were included in the analysis of turn parameters |
| Bengevoord A., et al., 2016 [31] | - No differences in demographics and disease development between groups - Sufficiently large power - Raters for FOG detection were independent and blinded for NFOG-Q scores - Standardisation of turning arc (retroreflective markers) - Statistical analyses were well described - Two separate analysis for trials with and without FOG | - Turning in laboratory settings (performance is different from performance at home) - Low frequency of FOG episodes 🡪 this potentially influences the power of the pre-FOG segments - No sensitivity analyses - No explanation on missing data - No reporting of numbers of individuals at each stage of the study |
| Bhatt H, et al., 2013 [35] | - No differences in demographics and disease development between groups - High inter-rater reliability for FOG-episodes - Mentioning of sources of bias | - The amount of FRs is too small to make a conclusion about turning strategies during a FOG episode - No explanation on how study size was arrived - No explanation on missing data - FOG-episodes were included in the analysis of turn parameters |
| De Souza Fortaleza Ac, et al., 2017 [41] | - No differences in demographics and disease development between groups (except for PIGD and mini-best) - Large sample size | - Groups were not matched for postural stability (mini-BEST and PIGD) - Instructions from examiner can be interpreted as cueing - Turning period to short for dual task + no instructions on task prioritization - No information on the frequency of FOG-episodes - No information on the in- or exclusion of FOG-episodes in the statistical analysis |
| Fietzek UM, et al., 2017 [37] | - Safety of patients was ascertained | - Groups were not matched for DD, LED and MDS-UPDRS - No exclusion of freezing trials - No information on the frequency of FOG-episodes - No explanation of how study size was arrived - No reporting of potential sources of bias - No information on randomisation of the protocol |
| Lohnes CA, et al., 2011 [40] | - No differences in demographics and disease development between groups - Missing data were well documented - Numbers of individuals at each stage of study was reported | - 2 different methods were used to measure saccades - No mentioning of how study size was arrived - Participants knew that their execution was being observed and monitored 🡪 influenced their performance - No information on the frequency of FOG-episodes - No information on the in- or exclusion of FOG-episodes in the statistical analysis |
| Mancini M, et al., 2017 [39] | - ANCOVA was used to correct for disease severity and PIGD - 2 independent movement disorder specialists blinded for group allocation rated FOG-severity | - Groups were not matched for UPDRS and PIGD - Only a sensor on the lumbar segment was used to characterise turning parameters - Freezing trials were not analysed separately |
| McNeely ME, et al., 2011 [43] | - Explanation on how study size was arrived - Statistical methods well described - Characteristics of study participants were well documented | - Groups were not matched for LED - All tests were executed in 1 day in fixed order: OFF state first, ON state second 🡪 fatigue or experience could affect the result - No reporting of potential sources of bias |
| Nieuwboer A, et al., 2009 [27] | - No differences in demographics and disease development between groups - Home setting - Data were analysed by a blinded rater who was not involved in data collection for cueing modality - Potential sources of bias were described - Explanation of how study size was arrived | - No reporting of numbers of individuals at each stage of study - No sensitivity analyses - No explanation of how missing data were addressed |
| Peterson DS, et al., 2012 [42] | - No differences in demographics and disease development between groups - The gait tasks were performed at comfortable, preferred pace - Potential sources of bias were described | - Setting, locations, relevant dates are not documented - No mentioning of how study size was arrived - No explanation on how missing data were addressed - No reporting of numbers of individuals at each stage of the study - No information on how freezing episodes were defined - No information on the in- or exclusion of FOG-episodes in the statistical analysis |
| Sijobert B, et al., 2016 [42] | - external validity - Eliminated learning bias | - No information on subject characteristics - No information on medication state while testing - No individual justifications - Small sample size (13 patients) - No mentioning of specific objectives and hypotheses - No explanation of how study size was arrived - No documentation of statistical analyses - No reporting of numbers of individuals at each stage of study - No information on the frequency of FOG-episodes - No information on the in- or exclusion of FOG-episodes in the statistical analysis |
| Spildooren J, et al., 2010 [28] | - No differences in demographics and disease development between groups (except for cognitive outcomes) - 2 raters were blinded for NFOG-Q score 🡪 they analysed all trials in which FOG occurred (independently) - Encouragement to standardize turning performance: placement of markers - Equal walking distance during turning trajectories, for each participant - Potential sources of bias are described | - FRs and NFRs were not matched for MMSE and SCOPA-COG - No explanation of how study size was arrived - No explanation of how missing data were addressed - No sensitivity analyses |
| Spildooren J, et al., 2012 [32] | - No differences in demographics and disease development between groups - Encouragement to standardize turning performance: placement of markers - Equal walking distance during turning trajectories, for each participant - Raters who detected the FOG episodes were independent and blinded for NFOG-Q score - Potential sources of bias were well described - Numbers of individuals at each stage of study are reported | - No explanation of how study size was arrived - No reporting of reasons for non-participation at each stage |
| Spildooren J, et al., 2013 [33] | - No differences in demographics and disease development between groups - Good standardization of the turning arc - Statistical analyses were well documented - Extra analyses were reported - Numbers of individuals at each stage of study were reported | - No reporting of potential sources of bias (methods) - No explanation on how study size was arrived |
| Vervoort G, et al., 2016 [34] | - Potential sources of bias were well described - Explanation of how quantitative variables were handled in analyses - Statistical analyses well documented | - FRs had higher age and MDS-UPDRS III scores compared to NFRs - Small number of FRs (n=13, compared to 60 NFRs) - No explanation on how study size was arrived - No reporting on how missing data were addressed |
| Willems AM, et al., 2007 [22] | - Clear parameters for gait - Statistical analyses well documented - Sources and data of methods of assessment for each variable of interest were documented - External validity was discussed | - FRs had higher age and DD compared to NFRs - The baseline measurements were not the same between the groups - Small sample size - Potential sources of bias were not well described - No explanation of how study size was arrived - No sensitivity analyses - No reporting of numbers of individuals at each stage of study |

FRs, Freezers; nFRS, non-freezers; FOG, freezing of gait; NFOG-Q, New Freezing of Gait Questionnaire; UPDRS, Unified Parkinson’s Disease Rating Scale; MDS-UPDRS-III, new modified version of UPDRS; DD, disease duration; LED, levodopa equivalent dose; MMSE, Mini-mental state examination; SCOPA-COG, scales for outcomes in Parkinson's Disease-cognition; PIGD, Postural instability and gait disorders; mini-Best, Mini Balance Evaluation Systems Test.

Supplementary table 4: The results on the STROBE checklist for case-control studies.

| |  | **Arias P, et al., 2010 [38]** | **Bengevoord A., et al., 2016 [31]** | **Bhatt H, et al., 2013 [35]** | **de Souza Fortaleza AC, et al., 2017 [41]** | **Fietzek UM, et al., 2017 [37]** | **Lohnes CA, et al., 2011 [40]** | **Mancini M, et al., 2017 [39]** | **McNeely ME, et al., 2011 [43]** | **Nieuwboer A, et al., 2009 [27]** | **Peterson DS, et al., 2012 [42]** | **Sijobert B, et al., 2016 [36]** | **Spildooren J, et al., 2010 [28]** | **Spildooren J, et al., 2012 [32]** | **Spildooren J, et al., 2013 [33]** | **Vervoort G, et al., 2016 [34]** | **Willems AM, et al., 2007 [22]** | | --- | --- | --- | --- | --- | --- | --- | --- | --- | --- | --- | --- | --- | --- | --- | --- | --- | | Title and abstract |  |  |  |  |  |  |  |  |  |  |  |  |  |  |  |  | | Study design |  |  |  |  |  |  |  |  |  |  |  |  |  |  |  |  | | Abstract |  |  |  |  |  |  |  |  |  |  |  |  |  |  |  |  | | Introduction |  |  |  |  |  |  |  |  |  |  |  |  |  |  |  |  | | Background |  |  |  |  |  |  |  |  |  |  |  |  |  |  |  |  | | Objectives |  |  |  |  |  |  |  |  |  |  |  |  |  |  |  |  | | Methods |  |  |  |  |  |  |  |  |  |  |  |  |  |  |  |  | | Study design |  |  |  |  |  |  |  |  |  |  |  |  |  |  |  |  | | Setting |  |  |  |  |  |  |  |  |  |  |  |  |  |  |  |  | | Selection participants |  |  |  |  |  |  |  |  |  |  |  |  |  |  |  |  | | Matching criteria | na | na |  | na | na | na | na | na | na |  | na |  |  |  | na | na | | Variables |  |  |  |  |  |  |  |  |  |  |  |  |  |  |  |  | | Measurement |  |  |  |  |  |  |  |  |  |  |  |  |  |  |  |  | | Bias |  |  |  |  |  |  |  |  |  |  |  |  |  |  |  |  | | Study size |  |  |  |  |  |  |  |  |  |  |  |  |  |  |  |  | | Quantitative variables |  |  |  |  |  |  |  |  |  |  |  |  |  |  |  |  | | Statistical methods |  |  |  |  |  |  |  |  |  |  |  |  |  |  |  |  | | Subgroups |  |  |  |  |  |  |  |  |  |  |  |  |  |  |  |  | | Missing data |  |  |  |  |  |  |  |  |  |  |  |  |  |  |  |  | | Matching group |  | na |  | na | na | na | na | na | na |  | na |  |  |  | na | na | | Sensitivity analysis |  |  |  |  |  |  |  |  |  |  |  |  |  |  |  |  | | Results |  |  |  |  |  |  |  |  |  |  |  |  |  |  |  |  | | Number of participants |  |  |  |  |  |  |  |  |  |  |  |  |  |  |  |  | | Non-participation |  |  |  |  |  |  |  |  |  |  |  |  |  |  |  |  | | Flow-diagram |  |  |  |  |  |  |  |  |  |  |  |  |  |  |  |  | | Subject characteristics |  |  |  |  |  |  |  |  |  |  |  |  |  |  |  |  | | Missing data |  |  |  |  |  |  |  |  |  |  |  |  |  |  |  |  | | Outcome data | na | na | na | na | na | na | na | na | na | na | na | na | na | na | na | na | | Unadjusted estimates |  |  |  |  |  |  |  |  |  |  |  |  |  |  |  |  | | Category boundaries | na |  | na | na | na | na | na | na | na | na | na | na | na | na | na | na | | Riskanalysis | na | na | na | na | na | na | na | na | na | na | na | na | na | na | na | na | | Other |  |  |  |  |  |  |  |  |  |  |  |  |  |  |  |  | | Discussion |  |  |  |  |  |  |  |  |  |  |  |  |  |  |  |  | | Key results |  |  |  |  |  |  |  |  |  |  |  |  |  |  |  |  | | Limitations |  |  |  |  |  |  |  |  |  |  |  |  |  |  |  |  | | Interpretation |  |  |  |  |  |  |  |  |  |  |  |  |  |  |  |  | | Generalisability |  |  |  |  |  |  |  |  |  |  |  |  |  |  |  |  | | Other information |  |  |  |  |  |  |  |  |  |  |  |  |  |  |  |  | | Funding |  |  |  |  |  |  |  |  |  |  |  |  |  |  |  |  |   = yes, = no, na= not applicable  Supplementary table 5: Quality assessment (presented in %) of the included articles.   | **Author(s)** | **%** | **Quality** | | --- | --- | --- | | Arias P, et al., 2010 [38] | 75,9% | High | | Bengevoord A., et al., 2016 [31] | 75,9% | High | | Bhatt H, et al., 2013 [35] | 66,7% | High | | De Souza Fortaleza AC, et al., 2017 [41] | 64.3% | High | | Fietzek UM, et al. 2017 [37] | 67,9% | High | | Lohnes CA, et al., 2011 [40] | 75% | High | | Mancini M, et al., 2017 [39] | 75% | High | | McNeely ME, et al., 2011 [43] | 67,9% | High | | Nieuwboer A, et al., 2009 [27] | 75% | High | | Peterson DS, et al., 2012 [42] | 73,3% | High | | Sijobert B, et al., 2016 [36] | 46,4% | Moderate | | Spildooren J, et al., 2010 [28] | 73,3% | High | | Spildooren J, et al., 2012 [32] | 80% | High | | Spildooren J, et al., 2013 [33] | 76,7% | High | | Vervoort G, et al., 2016 [34] | 75% | High | | Willems AM, et al., 2007 [22] | 64,3% | High |   *0-40% low, 41-60% moderate, 61-80% high and 81-100% very high |
| --- | --- | --- | --- | --- | --- | --- | --- | --- | --- | --- | --- | --- | --- | --- | --- | --- | --- | --- | --- | --- | --- | --- | --- | --- | --- | --- | --- | --- | --- | --- | --- | --- | --- | --- | --- | --- | --- | --- | --- | --- | --- | --- | --- | --- | --- | --- | --- | --- | --- | --- | --- | --- | --- | --- | --- | --- | --- | --- | --- | --- | --- | --- | --- | --- | --- | --- | --- | --- | --- | --- | --- | --- | --- | --- | --- | --- | --- | --- | --- | --- | --- | --- | --- | --- | --- | --- | --- | --- | --- | --- | --- | --- | --- | --- | --- | --- | --- | --- | --- | --- | --- | --- | --- | --- | --- | --- | --- | --- | --- | --- | --- | --- | --- | --- | --- | --- | --- | --- | --- | --- | --- | --- | --- | --- | --- | --- | --- | --- | --- | --- | --- | --- | --- | --- | --- | --- | --- | --- | --- | --- | --- | --- | --- | --- | --- | --- | --- | --- | --- | --- | --- | --- | --- | --- | --- | --- | --- | --- | --- | --- | --- | --- | --- | --- | --- | --- | --- | --- | --- | --- | --- | --- | --- | --- | --- | --- | --- | --- | --- | --- | --- | --- | --- | --- | --- | --- | --- | --- | --- | --- | --- | --- | --- | --- | --- | --- | --- | --- | --- | --- | --- | --- | --- | --- | --- | --- | --- | --- | --- | --- | --- | --- | --- | --- | --- | --- | --- | --- | --- | --- | --- | --- | --- | --- | --- | --- | --- | --- | --- | --- | --- | --- | --- | --- | --- | --- | --- | --- | --- | --- | --- | --- | --- | --- | --- | --- | --- | --- | --- | --- | --- | --- | --- | --- | --- | --- | --- | --- | --- | --- | --- | --- | --- | --- | --- | --- | --- | --- | --- | --- | --- | --- | --- | --- | --- | --- | --- | --- | --- | --- | --- | --- | --- | --- | --- | --- | --- | --- | --- | --- | --- | --- | --- | --- | --- | --- | --- | --- | --- | --- | --- | --- | --- | --- | --- | --- | --- | --- | --- | --- | --- | --- | --- | --- | --- | --- | --- | --- | --- | --- | --- | --- | --- | --- | --- | --- | --- | --- | --- | --- | --- | --- | --- | --- | --- | --- | --- | --- | --- | --- | --- | --- | --- | --- | --- | --- | --- | --- | --- | --- | --- | --- | --- | --- | --- | --- | --- | --- | --- | --- | --- | --- | --- | --- | --- | --- | --- | --- | --- | --- | --- | --- | --- | --- | --- | --- | --- | --- | --- | --- | --- | --- | --- | --- | --- | --- | --- | --- | --- | --- | --- | --- | --- | --- | --- | --- | --- | --- | --- | --- | --- | --- | --- | --- | --- | --- | --- | --- | --- | --- | --- | --- | --- | --- | --- | --- | --- | --- | --- | --- | --- | --- | --- | --- | --- | --- | --- | --- | --- | --- | --- | --- | --- | --- | --- | --- | --- | --- | --- | --- | --- | --- | --- | --- | --- | --- | --- | --- | --- | --- | --- | --- | --- | --- | --- | --- | --- | --- | --- | --- | --- | --- | --- | --- | --- | --- | --- | --- | --- | --- | --- | --- | --- | --- | --- | --- | --- | --- | --- | --- | --- | --- | --- | --- | --- | --- | --- | --- | --- | --- | --- | --- | --- | --- | --- | --- | --- | --- | --- | --- | --- | --- | --- | --- | --- | --- | --- | --- | --- | --- | --- | --- | --- | --- | --- | --- | --- | --- | --- | --- | --- | --- | --- | --- | --- | --- | --- | --- | --- | --- | --- | --- | --- | --- | --- | --- | --- | --- | --- | --- | --- | --- | --- | --- | --- | --- | --- | --- | --- | --- | --- | --- | --- | --- | --- | --- | --- | --- | --- | --- | --- | --- | --- | --- | --- | --- | --- | --- | --- | --- | --- | --- | --- | --- | --- | --- | --- | --- | --- | --- | --- | --- | --- | --- | --- | --- | --- | --- | --- | --- | --- | --- | --- | --- | --- | --- | --- | --- | --- | --- | --- | --- | --- | --- | --- | --- | --- | --- | --- | --- | --- | --- | --- | --- | --- | --- | --- | --- | --- | --- | --- | --- | --- | --- | --- | --- | --- | --- | --- | --- | --- | --- | --- | --- | --- | --- | --- | --- | --- | --- | --- | --- | --- | --- | --- | --- | --- | --- | --- | --- | --- | --- | --- | --- | --- | --- | --- | --- | --- | --- | --- | --- | --- | --- | --- | --- | --- | --- | --- | --- | --- | --- | --- | --- | --- | --- | --- | --- | --- | --- | --- | --- | --- | --- | --- | --- | --- | --- | --- | --- | --- | --- | --- | --- | --- | --- | --- | --- | --- | --- | --- | --- | --- | --- | --- | --- | --- | --- | --- | --- | --- | --- | --- | --- | --- | --- | --- | --- | --- | --- | --- | --- | --- | --- | --- | --- | --- | --- | --- | --- | --- |
